# Supplementary material
Source: PubMed Central journal article supplement (PMC3910568)
Supplement: 1317181111_pnas.201317181SI.pdf [file 1317181111_pnas.201317181SI.pdf]

# Supporting Information

Becker et al. 10.1073/pnas.1317181111

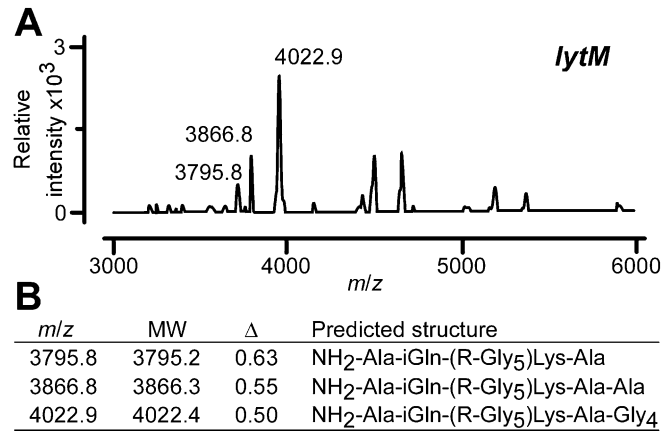

**Fig. S1.** Structure of protein A released by *lytM* mutant *Staphylococcus aureus*. (A) MALDI-TOF MS of C-terminal staphylococcal protein A (SpA) peptides released from the *S. aureus lytM* mutant. (B) Observed and predicted (MW) *m/z* ratios and their differentials ( $\Delta$ ) for SpA peptides released by the *S. aureus sle1* and *lytN* mutants with their predicted structures.

**Table S1. Edman degradation of protein A released from *S. aureus* envelope**

| Cycle | Amino acid released | Predicted residue | Amino acid abundance (pmol) |
|-------|---------------------|-------------------|-----------------------------|
| 1     | A                   | A/A               | 39.82                       |
| 2     | Q                   | Q                 | 9.85                        |
| 3     | Q                   | H                 | 8.09                        |
| 4     | D                   | D                 | 3.83                        |
| 5     | E                   | E                 | 5.23                        |
| 6     | A                   | A                 | 1.37                        |
| 7     | Q                   | Q                 | 0.81                        |
| 8     | Q                   | Q                 | 1.99                        |

**Table S2. Edman degradation of C-terminal peptide derived by cyanogen bromide cleavage of released protein A**

| Cycle | Amino acid released | Predicted residue | Amino acid abundance (pmol) |
|-------|---------------------|-------------------|-----------------------------|
| 1     | A/I                 | A/I               | 27.35/10.29                 |
| 2     | K                   | K                 | 7.54                        |
| 3     | P                   | P                 | 6.53                        |
| 4     | G                   | G                 | 7.38                        |
| 5     | Q                   | Q                 | 7.36                        |
| 6     | E                   | E                 | 6.09                        |
| 7     | L                   | L                 | 5.71                        |
| 8     | V                   | V                 | 5.02                        |
| 9     | V                   | V                 | 7.57                        |
| 10    | D                   | D                 | 5.24                        |
